# Supplementary material
Source: PubMed Central journal article supplement (PMC4034763)
Supplement: NIHMS585107-supplement-ESI_-_2.pdf [file NIHMS585107-supplement-ESI_-_2.pdf]

**Supplemental Table S1. Plasmid construction.**

|    | PCR template                 | template                      | 5' primer                                                                                                                                                                                                                                                                                                                                                                                                            | 3' primer                                                        | sites      |
|----|------------------------------|-------------------------------|----------------------------------------------------------------------------------------------------------------------------------------------------------------------------------------------------------------------------------------------------------------------------------------------------------------------------------------------------------------------------------------------------------------------|------------------------------------------------------------------|------------|
| 1  | GL for fusions               | pGLuc Basic, NEB              | atgcgaattcggcggagggtgggtccggaggcgggtg<br>ggagcgccaagcccaccgagaacaacgaagacttc                                                                                                                                                                                                                                                                                                                                         | gcatgcgccgcttagtcaccaccggcccccttg                                | EcoRI/NotI |
| 2  | secreted GL unfused          | pGLuc Basic, NEB              | atgctagcggccaccatggagtcgcaagtctcg                                                                                                                                                                                                                                                                                                                                                                                    | gcatgcgccgcttagtcaccaccggcccccttg                                | NheI/NotI  |
| 3  | CXCL12-alpha for GL fusion   | mCXCL12 (Luker et al., 2009b) | atgcctcagaggccaccatggagccaaggtcgtcg                                                                                                                                                                                                                                                                                                                                                                                  | gcatgaattcccctgtttaagctttctccaggtac                              | XhoI/EcoRI |
| 4  | CXCL12-beta for GL fusion    | mCXCL12 (Luker et al., 2009b) | atgcctcagaggccaccatggagccaaggtcgtcg                                                                                                                                                                                                                                                                                                                                                                                  | gcatgaattcccctgttagcctctgtttaagct<br>ttctccaggtac                | XhoI/EcoRI |
| 5  | CXCL12-gamma for GL fusion   | synthetic gene (IDT)          | ctcaggccaccatggagccaaggtcgtcgcgtgc<br>tggccctggtgctggcgcgctctgcatcagtgacggt<br>aaaccagtacgctgagctaccgatgccctgccggt<br>tcttcgagagccacatcgccagagccaacgtcaagca<br>tctgaaaatcctcaactcctcaaaactgtcccttcaga<br>ttgtgcacggctgaagaacaacaacagacaagtgtg<br>cattgacccgaaattaaagtgatccaagagtacctg<br>gagaaagctttaacaagggcgagagaagaaaa<br>agtggggaaaaaagaaagataggaaaaaagaag<br>cgacagaagaagagaaggctgccagaaaaaggaa<br>aaacgggaattc |                                                                  | XhoI/EcoRI |
| 6  | CXCL12-alpha unfused         | mCXCL12 (Luker et al., 2009b) | atgcttagagccaccatggagccaagg                                                                                                                                                                                                                                                                                                                                                                                          | gcatgcgccgcttactgtttaagctttctccagg                               | XbaI/NotI  |
| 7  | CXCL12-beta unfused          | mCXCL12 (Luker et al., 2009b) | atgcttagagccaccatggagccaagg                                                                                                                                                                                                                                                                                                                                                                                          | gcatgcgccgctcacatcttagcctctgtttaaa<br>g                          | XbaI/NotI  |
| 8  | CXCL12-gamma unfused         | synthetic gene (IDT)          | atgcttagagccaccatggagccaagg                                                                                                                                                                                                                                                                                                                                                                                          | gcatgcgccgcttagttttcttttctggcagcc                                | XbaI/NotI  |
| 9  | CXCL12-GL fusions for FU650W | fusion constructs in pEGFP-N1 | atgcttaattaagtaataacgagg (bases<br>6-27 of pEGFP-N1)                                                                                                                                                                                                                                                                                                                                                                 | gcatttaattaatggtatggctgattatgac<br>(bases 1413-1435 of pEGFP-N1) | PacI       |
| 10 | CXCL12-GL fusions for pLVX   | fusion constructs in pEGFP-N1 | atgcttagagccaccatggagccaagg                                                                                                                                                                                                                                                                                                                                                                                          | gcatgcgccgcttagtcaccaccggcccccttg                                | XbaI/NotI  |
| 11 | AcGFP-nuc                    | pAcGFP1-Nuc (Clontech)        | atgcttagagcagagctgggttagtgaaccg                                                                                                                                                                                                                                                                                                                                                                                      | atgtggtatggctgattaatgac                                          | XbaI       |

Luker, K., M. Gupta, and G. Luker. 2009a. Bioluminescent CXCL12 fusion protein for cellular studies of CXCR4 and CXCR7. *Biotechniques*. 47:625-632.
